# Supplementary material for: The Effectiveness and Toxicity of Frameless CyberKnife Based Radiosurgery for Parkinson’s Disease—Phase II Study
Source: MDPI journal article supplement (doi:10.3390/biomedicines11020288), 2023-01-20
Supplement: s1 [file s1]

**Table S1.** Treatment results of particular patients based on neurologist examination (N) and patients self-evaluation (P).

| Time of control visit | Total dose | FU duration (months) | 3 months FU visit                                 | 6 months FU visit                                   | 12 months FU visit                                  | Last follow-up visit                                | Time to tremor progression                                                         |
|-----------------------|------------|----------------------|---------------------------------------------------|-----------------------------------------------------|-----------------------------------------------------|-----------------------------------------------------|------------------------------------------------------------------------------------|
| Patient               |            |                      |                                                   |                                                     |                                                     |                                                     |                                                                                    |
| 1                     | 70 Gy      | 30                   | Improvement (N)<br>Improvement (P)                | <i>Progression</i> (N)<br><i>No improvement</i> (P) | No change (N)<br>No improvement (P)                 | No change (N)<br>No improvement (P)                 | 6 months                                                                           |
| 2                     | 70 Gy      | 36                   | Improvement (N)<br>Improvement (P)                | Improvement (N)<br>Improvement (P)                  | No change (N)<br>Improvement (P)                    | No change (N)<br>Improvement (P)                    | Not occurred                                                                       |
| 3                     | 70 Gy      | 43                   | Improvement (N)<br>Improvement (P)                | No change (N)<br>Improvement (P)                    | No change (N)<br>Improvement (P)                    | <i>Progression</i> (N)<br><i>No improvement</i> (P) | 36 months                                                                          |
| 4**                   | 75 Gy      | 38                   | No change (N)<br>Improvement (P)                  | No data                                             | No change (N)<br>Improvement (P)                    | Improvement (N)<br>Improvement (P)                  | Not occurred                                                                       |
| 5**                   | 75 Gy      | 31                   | Improvement (N)<br>Improvement (P)                | No change (N)<br>Improvement (P)                    | No change (N)<br>Improvement (P)                    | Improvement (N)<br>Improvement (P)                  | Not occurred                                                                       |
| 6                     | 75 Gy      | 25                   | Improvement (N)<br>Improvement (P)                | No change (N)<br>Improvement (P)                    | No change (N)<br>Improvement (P)                    | No change (N)<br>Improvement (P)                    | Not occurred                                                                       |
| 7                     | 80 Gy      | 13                   | <i>No change</i> (N)<br><i>No improvement</i> (P) | <i>Progression</i> (N)<br><i>No improvement</i> (P) | <i>Progression</i> (N)<br><i>No improvement</i> (P) | <i>Progression</i> (N)<br><i>No improvement</i> (P) | <i>Not responded to treatment</i>                                                  |
| 8*                    | 80 Gy      | 30                   | <i>Progression</i> (N)<br>No improvement (P)      | No change (N)<br>No improvement (P)                 | Improvement (N)<br>Improvement (P)                  | <i>Progression</i> (N)<br><i>No improvement</i> (P) | 3 months and 30 months (after improvement period between 3 to 24 months after SRS) |
| 9                     | 80 Gy      | 6                    | Improvement (N)<br>Improvement (P)                | Improvement (N)<br>Improvement (P)                  | No data                                             | Improvement (N)<br>Improvement (P)                  | Not occurred                                                                       |
| 10                    | 85 Gy      | 25                   | Improvement (N)                                   | No change (N)<br>Improvement (P)                    | No change (N)<br>Improvement (P)                    | No change (N)<br>Improvement (P)                    | Not occurred                                                                       |

|      |        |    |                    |                           |                           |                           |                                   |  |
|------|--------|----|--------------------|---------------------------|---------------------------|---------------------------|-----------------------------------|--|
|      |        |    | Improvement (P)    |                           |                           |                           |                                   |  |
| 11** | 85 Gy  | 35 | No change (N)      | No change (N)             | No change (N)             | No change (N)             | Not occurred                      |  |
|      |        |    | Improvement (P)    | Improvement (P)           | Improvement (P)           | Improvement (P)           |                                   |  |
| 12*  | 85 Gy  | 19 | Improvement (N)    | No change (N)             | Improvement (N)           | No change (N)             | Not occurred                      |  |
|      |        |    | Improvement (P)    | Improvement (P)           | Improvement (P)           | Improvement (P)           |                                   |  |
| 13   | 90 Gy  | 10 | Improvement (N)    | No change (N)             |                           | No change (N)             | Not occurred                      |  |
|      |        |    | Improvement (P)    | Improvement (P)           | No data                   | Improvement (P)           |                                   |  |
| 14   | 90 Gy  | 18 | Improvement (N)    | <b>Progression (N)</b>    | No change (N)             | <b>Progression (N)</b>    | 5 months                          |  |
|      |        |    | Improvement (P)    | <b>No improvement (P)</b> | No improvement (P)        | <b>No improvement (P)</b> |                                   |  |
| 15   | 95 Gy  | 23 | Improvement (N)    | No change (N)             | <b>Progression (N)</b>    | No change (N)             | 9 months                          |  |
|      |        |    | Improvement (P)    | Improvement (P)           | <b>No improvement (P)</b> | No improvement (P)        |                                   |  |
| 16   | 95 Gy  | 14 | No data            | No data                   | <b>Progression (N)</b>    | <b>Progression (N)</b>    | <b>Not responded to treatment</b> |  |
|      |        |    |                    |                           | <b>No improvement (P)</b> | <b>No improvement (P)</b> |                                   |  |
| 17*  | 95 Gy  | 14 | Improvement (N)    | No data                   | Improvement (N)           | Improvement (N)           | Not occurred                      |  |
|      |        |    | Improvement (P)    |                           | Improvement (P)           | Improvement (P)           |                                   |  |
| 18   | 100 Gy | 9  | No change (N)      | No change (N)             |                           | No change (N)             | Not occurred                      |  |
|      |        |    | No improvement (P) | No improvement (P)        | No data                   | No improvement (P)        |                                   |  |
| 19*  | 100 Gy | 12 | No data            | No data                   | No change (N)             | No change (N)             | Not occurred                      |  |
|      |        |    |                    |                           | Improvement (P)           | Improvement (P)           |                                   |  |
| 20   | 100 Gy | 19 | No change (N)      | Improvement (N)           | No change (N)             | No change (N)             | Not occurred                      |  |
|      |        |    | Improvement (P)    | Improvement (P)           | Improvement (P)           | No improvement (P)        |                                   |  |
| 21   | 105 Gy | 4  | No change (N)      | No data                   | No data                   | No change (N)             | Not occurred                      |  |
|      |        |    | Improvement (P)    |                           |                           | Improvement (P)           |                                   |  |

\* Late (8,12,17,19) and \*\*very late (4,5,11) responders - maximum improvement observed at 12 to 14 and 24 to 35 months after the treatment, respectively
